# Supplementary material
Source: MDPI journal article supplement (https://www.mdpi.com/2073-4352/10/6/477)

# checkCIF/PLATON report

Structure factors have been supplied for datablock(s) I

THIS REPORT IS FOR GUIDANCE ONLY. IF USED AS PART OF A REVIEW PROCEDURE FOR PUBLICATION, IT SHOULD NOT REPLACE THE EXPERTISE OF AN EXPERIENCED CRYSTALLOGRAPHIC REFEREE.

No syntax errors found.      CIF dictionary      Interpreting this report

## Datablock: I

---

Bond precision:    C-C = 0.0013 A

Wavelength=0.71073

Cell:                    a=7.8673(5)                    b=11.0031(7)                    c=11.7131(6)  
                          alpha=82.325(2)                    beta=89.994(2)                    gamma=81.179(2)  
Temperature:    100 K

|                | Calculated                | Reported                  |
|----------------|---------------------------|---------------------------|
| Volume         | 992.76(10)                | 992.76(10)                |
| Space group    | P -1                      | P -1                      |
| Hall group     | -P 1                      | -P 1                      |
| Moiety formula | C36 H20 Br3.77 Cl8 Cu2 N4 | C36 H20 Br3.77 Cl8 Cu2 N4 |
| Sum formula    | C36 H20 Br3.77 Cl8 Cu2 N4 | C36 H20 Br3.77 Cl8 Cu2 N4 |
| Mr             | 1220.83                   | 1220.83                   |
| Dx,g cm-3      | 2.042                     | 2.041                     |
| Z              | 1                         | 1                         |
| Mu (mm-1)      | 5.443                     | 5.438                     |
| F000           | 590.1                     | 590.0                     |
| F000'          | 591.03                    |                           |
| h,k,lmax       | 15,21,23                  | 15,21,23                  |
| Nref           | 16613                     | 16169                     |
| Tmin,Tmax      | 0.240,0.337               | 0.338,0.447               |
| Tmin'          | 0.143                     |                           |

Correction method= # Reported T Limits: Tmin=0.338 Tmax=0.447  
AbsCorr = EMPIRICAL

Data completeness= 0.973

Theta(max)= 45.293

R(reflections)= 0.0250( 13645)

wR2(reflections)= 0.0671( 16169)

S = 1.062

Npar= 245

---

The following ALERTS were generated. Each ALERT has the format

**test-name\_ALERT\_alert-type\_alert-level.**

Click on the hyperlinks for more details of the test.

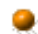

#### Alert level B

PLAT934\_ALERT\_3\_B Number of (Iobs-Icalc)/Sigma(W) > 10 Outliers ..

4 Check

**Author Response:** This error refers to (2 -9 4), (-5 7 5), (5 -8 7) and (-6 -1 7) outliers, which have been likely over-corrected for absorption. Due to surface roughness and black crystal colour, applying a reliable analytical correction was impossible. Including or not these outliers out of 16169 symmetry-independent reflections in the data set do not change significantly the spherical atoms outcomes.

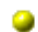

#### Alert level C

PLAT077\_ALERT\_4\_C Unitcell Contains Non-integer Number of Atoms ..

Please Check

**Author Response:** The presence of non-integer number of atoms is consistent with the fractional occupance of the bromine atom BR1.

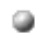

#### Alert level G

|                   |                                                  |              |
|-------------------|--------------------------------------------------|--------------|
| PLAT068_ALERT_1_G | Reported F000 Differs from Calcd (or Missing)... | Please Check |
| PLAT154_ALERT_1_G | The s.u.'s on the Cell Angles are Equal ..(Note) | 0.002 Degree |
| PLAT232_ALERT_2_G | Hirshfeld Test Diff (M-X) Br1 --Cu .             | 29.8 s.u.    |
| PLAT232_ALERT_2_G | Hirshfeld Test Diff (M-X) Cu --N1 .              | 8.5 s.u.     |
| PLAT232_ALERT_2_G | Hirshfeld Test Diff (M-X) Cu --N2 .              | 9.5 s.u.     |
| PLAT301_ALERT_3_G | Main Residue Disorder .....(Resd 1 )             | 3% Note      |
| PLAT304_ALERT_4_G | Non-Integer Number of Atoms in ..... (Resd 1 )   | 73.77 Check  |
| PLAT434_ALERT_2_G | Short Inter HL..HL Contact Cl1 ..Cl12            | 3.27 Ang.    |
|                   | -1+x,1+y,-1+z =                                  | 1_464 Check  |
| PLAT883_ALERT_1_G | No Info/Value for _atom_sites_solution_primary . | Please Do !  |
| PLAT912_ALERT_4_G | Missing # of FCF Reflections Above STh/L= 0.600  | 444 Note     |
| PLAT978_ALERT_2_G | Number C-C Bonds with Positive Residual Density. | 7 Info       |

- 
- 0 **ALERT level A** = Most likely a serious problem - resolve or explain  
1 **ALERT level B** = A potentially serious problem, consider carefully  
1 **ALERT level C** = Check. Ensure it is not caused by an omission or oversight  
11 **ALERT level G** = General information/check it is not something unexpected
- 3 ALERT type 1 CIF construction/syntax error, inconsistent or missing data  
5 ALERT type 2 Indicator that the structure model may be wrong or deficient  
2 ALERT type 3 Indicator that the structure quality may be low  
3 ALERT type 4 Improvement, methodology, query or suggestion  
0 ALERT type 5 Informative message, check
- 

## checkCIF publication errors

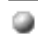

### Alert level G

PUBL017\_ALERT\_1\_G The \_publ\_section\_references section is missing or empty.

---

0 **ALERT level A** = Data missing that is essential or data in wrong format

1 **ALERT level G** = General alerts. Data that may be required is missing

---

## Publication of your CIF

You should attempt to resolve as many as possible of the alerts in all categories. Often the minor alerts point to easily fixed oversights, errors and omissions in your CIF or refinement strategy, so attention to these fine details can be worthwhile. In order to resolve some of the more serious problems it may be necessary to carry out additional measurements or structure refinements. However, the nature of your study may justify the reported deviations from journal submission requirements and the more serious of these should be commented upon in the discussion or experimental section of a paper or in the "special\_details" fields of the CIF. *checkCIF* was carefully designed to identify outliers and unusual parameters, but every test has its limitations and alerts that are not important in a particular case may appear. Conversely, the absence of alerts does not guarantee there are no aspects of the results needing attention. It is up to the individual to critically assess their own results and, if necessary, seek expert advice.

If you wish to submit your CIF for publication in Acta Crystallographica Section C or E, you should upload your CIF via the web. If you wish to submit your CIF for publication in IUCrData you should upload your CIF via the web. If your CIF is to form part of a submission to another IUCr journal, you will be asked, either during electronic submission or by the Co-editor handling your paper, to upload your CIF via our web site.

---

**PLATON version of 22/12/2019; check.def file version of 13/12/2019**

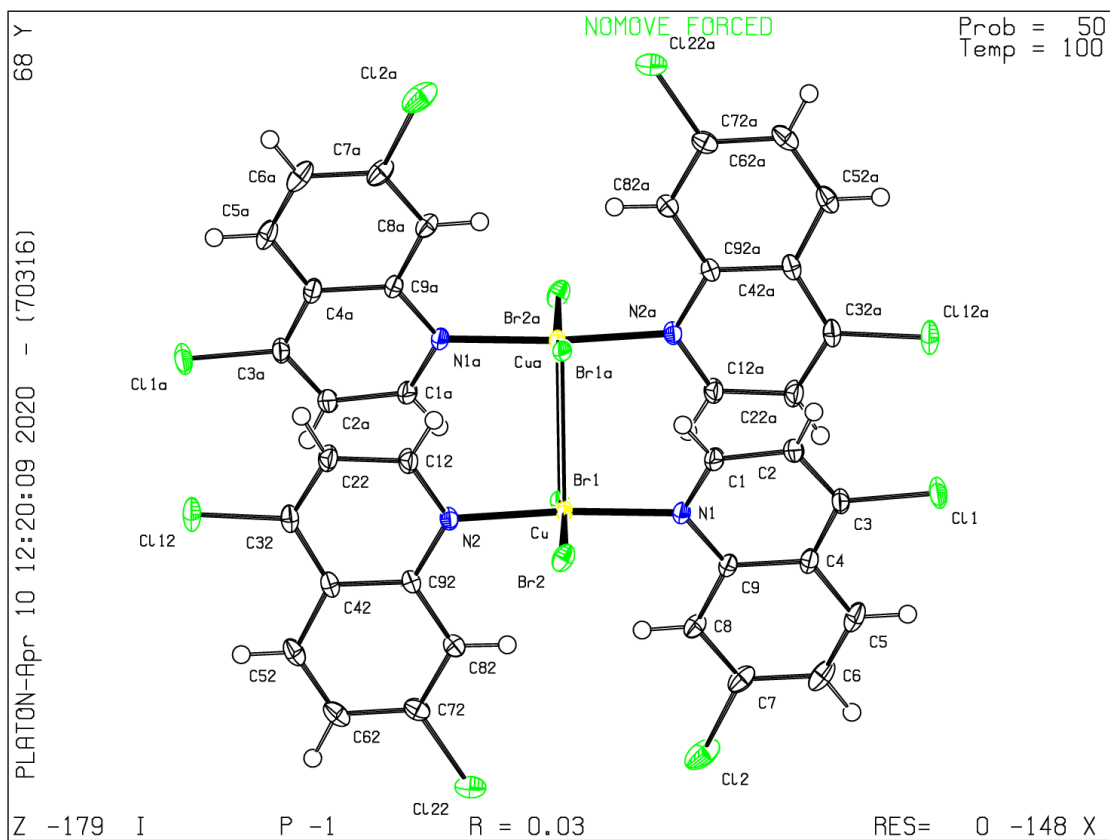

Supplement: s1 [file s1]
